# Supplementary material
Source: PubMed Central journal article supplement (PMC3382998)

# checkCIF/PLATON report

No syntax errors found. CIF dictionary Interpreting this report

## Datablock: asb101

---

Bond precision: C-C = 0.0032 A Wavelength=0.71073

Cell: a=9.3786(5) b=18.1064(9) c=17.4684(9)  
alpha=90 beta=93.4637(6) gamma=90

Temperature: 153 K

|                | Calculated           | Reported             |
|----------------|----------------------|----------------------|
| Volume         | 2960.9(3)            | 2960.9(3)            |
| Space group    | P 21/c               | P2(1)/c              |
| Hall group     | -P 2ybc              | ?                    |
| Moiety formula | C29 H37 Cl2 N5 Ni O2 | ?                    |
| Sum formula    | C29 H37 Cl2 N5 Ni O2 | C29 H37 Cl2 N5 Ni O2 |
| Mr             | 617.23               | 617.25               |
| Dx,g cm-3      | 1.385                | 1.385                |
| Z              | 4                    | 4                    |
| Mu (mm-1)      | 0.871                | 0.871                |
| F000           | 1296.0               | 1296.0               |
| F000'          | 1298.89              |                      |
| h,k,lmax       | 12,23,22             | 12,23,22             |
| Nref           | 6519                 | 6508                 |
| Tmin,Tmax      | 0.818,0.878          | 0.825,0.881          |
| Tmin'          | 0.818                |                      |

Correction method= MULTI-SCAN

Data completeness= 0.998 Theta(max)= 27.100

R(reflections)= 0.0382( 5858) wR2(reflections)= 0.1057( 6508)

S = 1.053 Npar= 467

---

The following ALERTS were generated. Each ALERT has the format

**test-name\_ALERT\_alert-type\_alert-level.**

Click on the hyperlinks for more details of the test.

---

### Alert level A

PLAT222\_ALERT\_3\_A Large Non-Solvent H Ueq(max)/Ueq(min) ... 5.88 Ratio

---

### Alert level B

PLAT094\_ALERT\_2\_B Ratio of Maximum / Minimum Residual Density .... 4.34

PLAT391\_ALERT\_3\_B Deviating Methyl C10 H-C-H Bond Angle ..... 99.00 Deg.

● **Alert level C**

PLAT220\_ALERT\_2\_C Large Non-Solvent C Ueq(max)/Ueq(min) ... 2.69 Ratio  
PLAT351\_ALERT\_3\_C Long C-H Bond (0.96A) C10 - H10C ... 1.13 Ang.  
PLAT390\_ALERT\_3\_C Deviating Methyl C11 X-C-H Bond Angle ..... 117.10 Deg.

● **Alert level G**

PLAT164\_ALERT\_4\_G Nr. of Refined C-H H-Atoms in Heavy-Atom Struct. 26

- 1 **ALERT level A** = In general: serious problem
- 2 **ALERT level B** = Potentially serious problem
- 3 **ALERT level C** = Check and explain
- 1 **ALERT level G** = General alerts; check

- 0 ALERT type 1 CIF construction/syntax error, inconsistent or missing data
- 2 ALERT type 2 Indicator that the structure model may be wrong or deficient
- 4 ALERT type 3 Indicator that the structure quality may be low
- 1 ALERT type 4 Improvement, methodology, query or suggestion
- 0 ALERT type 5 Informative message, check

Publication of your CIF in IUCr journals

A basic structural check has been run on your CIF. These basic checks will be run on all CIFs submitted for publication in IUCr journals (*Acta Crystallographica*, *Journal of Applied Crystallography*, *Journal of Synchrotron Radiation*); however, if you intend to submit to *Acta Crystallographica Section C* or *E*, you should make sure that full publication checks are run on the final version of your CIF prior to submission.

Publication of your CIF in other journals

Please refer to the *Notes for Authors* of the relevant journal for any special instructions relating to CIF submission.

PLATON version of 19/05/2009; check.def file version of 13/05/2009

Datablock asb101 - ellipsoid plot

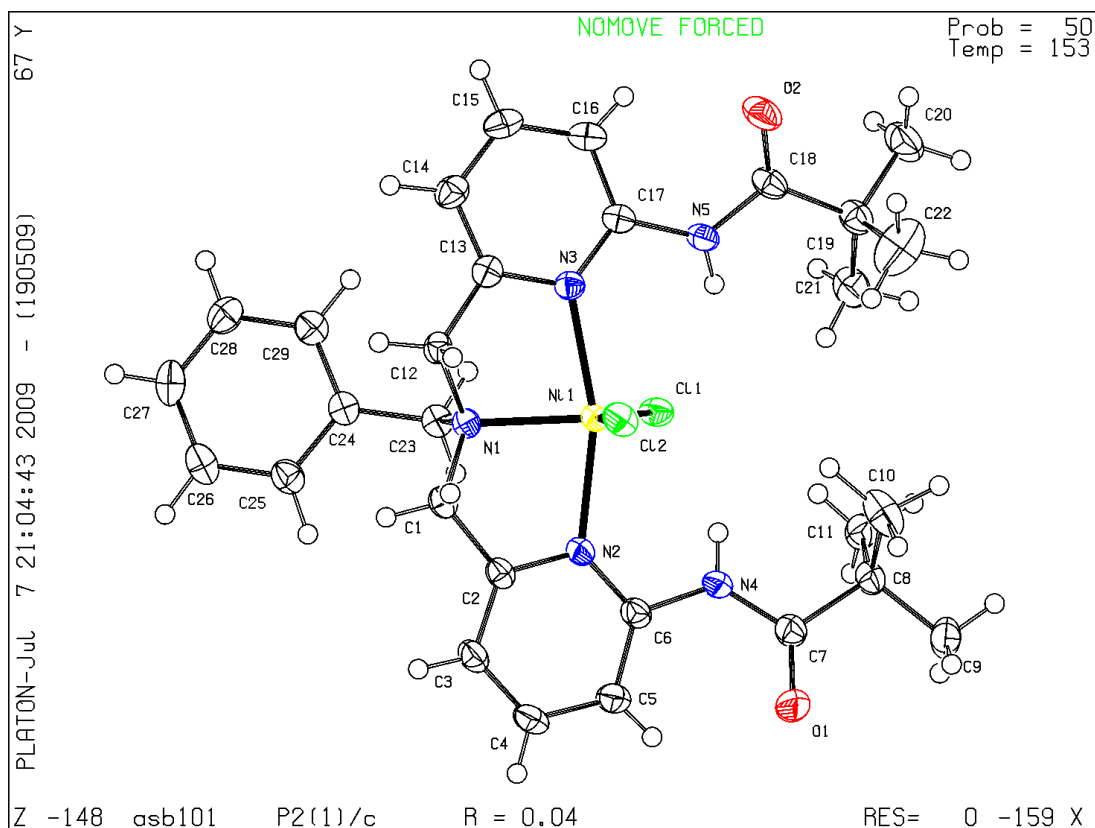

# checkCIF/PLATON report

No syntax errors found.    CIF dictionary    Interpreting this report

## Datablock: asb124

---

Bond precision:    C-C = 0.0040 Å                      Wavelength=0.71073

Cell:                      a=13.452(2)              b=14.834(3)              c=17.896(3)  
                            alpha=90                      beta=102.073(2)              gamma=90

Temperature:              153 K

|                | Calculated                | Reported         |
|----------------|---------------------------|------------------|
| Volume         | 3492.1(11)                | 3492.4(10)       |
| Space group    | P c                       | Pc               |
| Hall group     | P -2yc                    | ?                |
| Moiety formula | C33 H43 N5 Ni O6, C2 H3 N | ?                |
| Sum formula    | C35 H46 N6 Ni O6          | C35 H46 N6 Ni O6 |
| Mr             | 705.47                    | 705.49           |
| Dx,g cm-3      | 1.342                     | 1.342            |
| Z              | 4                         | 4                |
| Mu (mm-1)      | 0.609                     | 0.609            |
| F000           | 1496.0                    | 1496.0           |
| F000'          | 1497.91                   |                  |
| h,k,lmax       | 17,19,22                  | 17,19,22         |
| Nref           | 7718[ 15417]              | 15208            |
| Tmin,Tmax      | 0.848,0.958               | 0.853,0.961      |
| Tmin'          | 0.848                     |                  |

Correction method= MULTI-SCAN

Data completeness= 1.97/0.99                      Theta(max)= 27.100

R(reflections)= 0.0363( 12167)                      wR2(reflections)= 0.0807( 15208)

S = 1.004                                              Npar= 900

---

The following ALERTS were generated. Each ALERT has the format

**test-name\_ALERT\_alert-type\_alert-level.**

Click on the hyperlinks for more details of the test.

---

### Alert level A

PLAT222\_ALERT\_3\_A Large Non-Solvent    H    Ueq(max)/Ueq(min) ...    5.08 Ratio

---

### Alert level C

STRVA01\_ALERT\_4\_C                      Flack test results are ambiguous.  
                            From the CIF: \_refine\_ls\_abs\_structure\_Flack    0.372

From the CIF: `_refine_ls_abs_structure_Flack_su` 0.007  
 PLAT232\_ALERT\_2\_C Hirshfeld Test Diff (M-X) Ni2 -- O9 .. 6.63 su  
 PLAT245\_ALERT\_2\_C U(iso) H5 Smaller than U(eq) N5 by ... 0.01 AngSq  
 PLAT352\_ALERT\_3\_C Short N-H Bond (0.87A) N9 - H9 ... 0.74 Ang.  
 PLAT790\_ALERT\_4\_C Centre of Gravity not Within Unit Cell: Resd. # 2  
     C33 H43 N5 Ni O6  
 PLAT790\_ALERT\_4\_C Centre of Gravity not Within Unit Cell: Resd. # 3  
     C2 H3 N

### Alert level G

REFLT03\_ALERT\_4\_G Please check that the estimate of the number of Friedel pairs is correct. If it is not, please give the correct count in the `_publ_section_exptl_refinement` section of the submitted CIF.

From the CIF: `_diffn_refl_theta_max` 27.10

From the CIF: `_reflns_number_total` 15208

Count of symmetry unique reflns 7718

Completeness (`_total/calc`) 197.05%

TEST3: Check Friedels for noncentro structure

Estimate of Friedel pairs measured 7490

Fraction of Friedel pairs measured 0.970

Are heavy atom types Z>Si present yes

PLAT860\_ALERT\_3\_G Note: Number of Least-Squares Restraints ..... 2  
 PLAT033\_ALERT\_4\_G Flack x Parameter Value Deviates from Zero ..... 0.37  
 PLAT710\_ALERT\_4\_G Delete 1-2-3 or 2-3-4 Linear Torsion Angle ... # 144  
     O5 -NI1 -C30 -C31 80.00 5.00 1.555 1.555 1.555 1.555  
 PLAT710\_ALERT\_4\_G Delete 1-2-3 or 2-3-4 Linear Torsion Angle ... # 145  
     N1 -NI1 -C30 -C31 -102.00 5.00 1.555 1.555 1.555 1.555  
 PLAT710\_ALERT\_4\_G Delete 1-2-3 or 2-3-4 Linear Torsion Angle ... # 146  
     O3 -NI1 -C30 -C31 80.00 5.00 1.555 1.555 1.555 1.555  
 PLAT710\_ALERT\_4\_G Delete 1-2-3 or 2-3-4 Linear Torsion Angle ... # 147  
     N2 -NI1 -C30 -C31 175.00 5.00 1.555 1.555 1.555 1.555  
 PLAT710\_ALERT\_4\_G Delete 1-2-3 or 2-3-4 Linear Torsion Angle ... # 148  
     N3 -NI1 -C30 -C31 -19.00 5.00 1.555 1.555 1.555 1.555  
 PLAT710\_ALERT\_4\_G Delete 1-2-3 or 2-3-4 Linear Torsion Angle ... # 149  
     O4 -NI1 -C30 -C31 -103.00 5.00 1.555 1.555 1.555 1.555  
 PLAT710\_ALERT\_4\_G Delete 1-2-3 or 2-3-4 Linear Torsion Angle ... # 295  
     O11 -NI2 -C63 -C64 107.00 7.00 1.555 1.555 1.555 1.555  
 PLAT710\_ALERT\_4\_G Delete 1-2-3 or 2-3-4 Linear Torsion Angle ... # 296  
     N6 -NI2 -C63 -C64 -67.00 7.00 1.555 1.555 1.555 1.555  
 PLAT710\_ALERT\_4\_G Delete 1-2-3 or 2-3-4 Linear Torsion Angle ... # 297  
     O10 -NI2 -C63 -C64 -66.00 7.00 1.555 1.555 1.555 1.555  
 PLAT710\_ALERT\_4\_G Delete 1-2-3 or 2-3-4 Linear Torsion Angle ... # 298  
     N7 -NI2 -C63 -C64 -151.00 7.00 1.555 1.555 1.555 1.555  
 PLAT710\_ALERT\_4\_G Delete 1-2-3 or 2-3-4 Linear Torsion Angle ... # 299  
     N8 -NI2 -C63 -C64 14.00 7.00 1.555 1.555 1.555 1.555  
 PLAT710\_ALERT\_4\_G Delete 1-2-3 or 2-3-4 Linear Torsion Angle ... # 300  
     O9 -NI2 -C63 -C64 115.00 7.00 1.555 1.555 1.555 1.555

1 **ALERT level A** = In general: serious problem

0 **ALERT level B** = Potentially serious problem

6 **ALERT level C** = Check and explain

15 **ALERT level G** = General alerts; check

0 ALERT type 1 CIF construction/syntax error, inconsistent or missing data

2 ALERT type 2 Indicator that the structure model may be wrong or deficient

3 ALERT type 3 Indicator that the structure quality may be low

17 ALERT type 4 Improvement, methodology, query or suggestion

0 ALERT type 5 Informative message, check

Publication of your CIF in IUCr journals

A basic structural check has been run on your CIF. These basic checks will be run on all CIFs submitted for publication in IUCr journals (*Acta Crystallographica*, *Journal of Applied Crystallography*, *Journal of Synchrotron Radiation*); however, if you intend to submit to *Acta Crystallographica Section C* or *E*, you should make sure that full publication checks are run on the final version of your CIF prior to submission.

Publication of your CIF in other journals

Please refer to the *Notes for Authors* of the relevant journal for any special instructions relating to CIF submission.

PLATON version of 13/08/2009; check.def file version of 12/08/2009

Datablock asb124 - ellipsoid plot

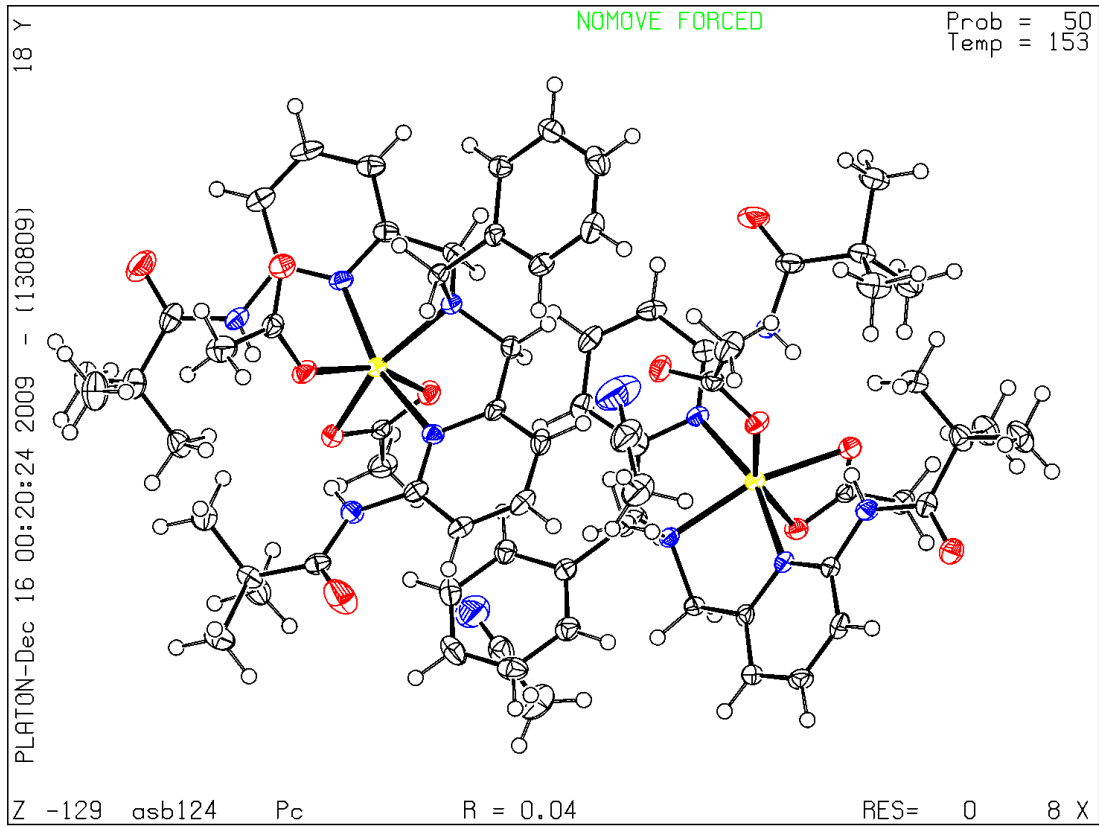

# checkCIF/PLATON report

No syntax errors found. CIF dictionary Interpreting this report

## Datablock: asb130

---

Bond precision: C-C = 0.0030 A

Wavelength=0.71073

Cell: a=9.8123(5) b=11.8641(6) c=13.4619(7)  
alpha=82.8894(7) beta=82.2732(7) gamma=88.6757(7)  
Temperature: 98 K

|                | Calculated              | Reported         |
|----------------|-------------------------|------------------|
| Volume         | 1540.95(14)             | 1540.95(14)      |
| Space group    | P -1                    | P-1              |
| Hall group     | -P 1                    | ?                |
| Moiety formula | C31 H39 N5 Ni O3, C2 H4 | ?                |
| Sum formula    | C33 H43 N5 Ni O3        | C33 H43 N5 Ni O3 |
| Mr             | 616.41                  | 616.43           |
| Dx,g cm-3      | 1.329                   | 1.329            |
| Z              | 2                       | 2                |
| Mu (mm-1)      | 0.671                   | 0.671            |
| F000           | 656.0                   | 656.0            |
| F000'          | 656.89                  |                  |
| h,k,lmax       | 12,15,17                | 12,15,17         |
| Nref           | 6802                    | 6753             |
| Tmin,Tmax      | 0.901,0.916             | 0.866,0.918      |
| Tmin'          | 0.863                   |                  |

Correction method= MULTI-SCAN

Data completeness= 0.993

Theta(max)= 27.100

R(reflections)= 0.0399( 5622)

wR2(reflections)= 0.1032( 6753)

S = 1.028

Npar= 381

---

The following ALERTS were generated. Each ALERT has the format

**test-name\_ALERT\_alert-type\_alert-level.**

Click on the hyperlinks for more details of the test.

---

### Alert level A

|                   |                           |      |    |      |    |      |      |
|-------------------|---------------------------|------|----|------|----|------|------|
| PLAT432_ALERT_2_A | Short Inter X...Y Contact | O3   | .. | C31  | .. | 2.33 | Ang. |
| PLAT432_ALERT_2_A | Short Inter X...Y Contact | O3   | .. | C32  | .. | 2.35 | Ang. |
| PLAT432_ALERT_2_A | Short Inter X...Y Contact | O3   | .. | C32A | .. | 2.37 | Ang. |
| PLAT432_ALERT_2_A | Short Inter X...Y Contact | O3   | .. | C31A | .. | 2.38 | Ang. |
| PLAT432_ALERT_2_A | Short Inter X...Y Contact | C31A | .. | C30  | .. | 1.32 | Ang. |
| PLAT432_ALERT_2_A | Short Inter X...Y Contact | C31A | .. | C33A | .. | 2.39 | Ang. |

PLAT432\_ALERT\_2\_A Short Inter X...Y Contact C32 .. C33A .. 1.44 Ang.  
PLAT432\_ALERT\_2\_A Short Inter X...Y Contact C32 .. C30 .. 2.32 Ang.

---

**Alert level B**

PLAT201\_ALERT\_2\_B Isotropic non-H Atoms in Main Residue(s) ..... 5  
PLAT413\_ALERT\_2\_B Short Inter XH3 .. XHn H23A .. H11E .. 2.07 Ang.

---

**Alert level C**

PLAT094\_ALERT\_2\_C Ratio of Maximum / Minimum Residual Density .... 2.18  
PLAT202\_ALERT\_3\_C Isotropic non-H Atoms in Anion/Solvent ..... 2  
PLAT222\_ALERT\_3\_C Large Non-Solvent H Ueq(max)/Ueq(min) ... 3.24 Ratio  
PLAT195\_ALERT\_1\_C Missing \_cell\_measurement\_theta\_max datum .... ?  
PLAT196\_ALERT\_1\_C Missing \_cell\_measurement\_theta\_min datum .... ?

---

**Alert level G**

PLAT301\_ALERT\_3\_G Note: Main Residue Disorder ..... 11.00 Perc.  
PLAT154\_ALERT\_1\_G The su's on the Cell Angles are Equal (x 10000) 70 Deg.  
PLAT302\_ALERT\_4\_G Note: Anion/Solvent Disorder ..... 50.00 Perc.  
PLAT720\_ALERT\_4\_G Number of Unusual/Non-Standard Labels ..... 3  
PLAT779\_ALERT\_4\_G Suspect or Irrelevant (Bond) Angle in CIF ..... 12.80 Deg.  
C30A -O3 -C30 1.555 1.555 1.555  
PLAT779\_ALERT\_4\_G Suspect or Irrelevant (Bond) Angle in CIF ..... 23.30 Deg.  
C33A -O3 -C33 1.555 1.555 1.555  
PLAT779\_ALERT\_4\_G Suspect or Irrelevant (Bond) Angle in CIF ..... 38.50 Deg.  
C10A -C8 -C10 1.555 1.555 1.555  
PLAT779\_ALERT\_4\_G Suspect or Irrelevant (Bond) Angle in CIF ..... 34.10 Deg.  
C9 -C8 -C9A 1.555 1.555 1.555  
PLAT811\_ALERT\_5\_G No ADDSYM Analysis: Too Many Excluded Atoms .... !

---

8 **ALERT level A** = In general: serious problem  
2 **ALERT level B** = Potentially serious problem  
5 **ALERT level C** = Check and explain  
9 **ALERT level G** = General alerts; check

3 ALERT type 1 CIF construction/syntax error, inconsistent or missing data  
11 ALERT type 2 Indicator that the structure model may be wrong or deficient  
3 ALERT type 3 Indicator that the structure quality may be low  
6 ALERT type 4 Improvement, methodology, query or suggestion  
1 ALERT type 5 Informative message, check

---

Publication of your CIF in IUCr journals

A basic structural check has been run on your CIF. These basic checks will be run on all CIFs submitted for publication in IUCr journals (*Acta Crystallographica*, *Journal of Applied Crystallography*, *Journal of Synchrotron Radiation*); however, if you intend to submit to *Acta Crystallographica Section C* or *E*, you should make sure that full publication checks are run on the final version of your CIF prior to submission.

Publication of your CIF in other journals

Please refer to the *Notes for Authors* of the relevant journal for any special instructions relating to CIF submission.

PLATON version of 13/08/2009; check.def file version of 12/08/2009

Datablock asb130 - ellipsoid plot

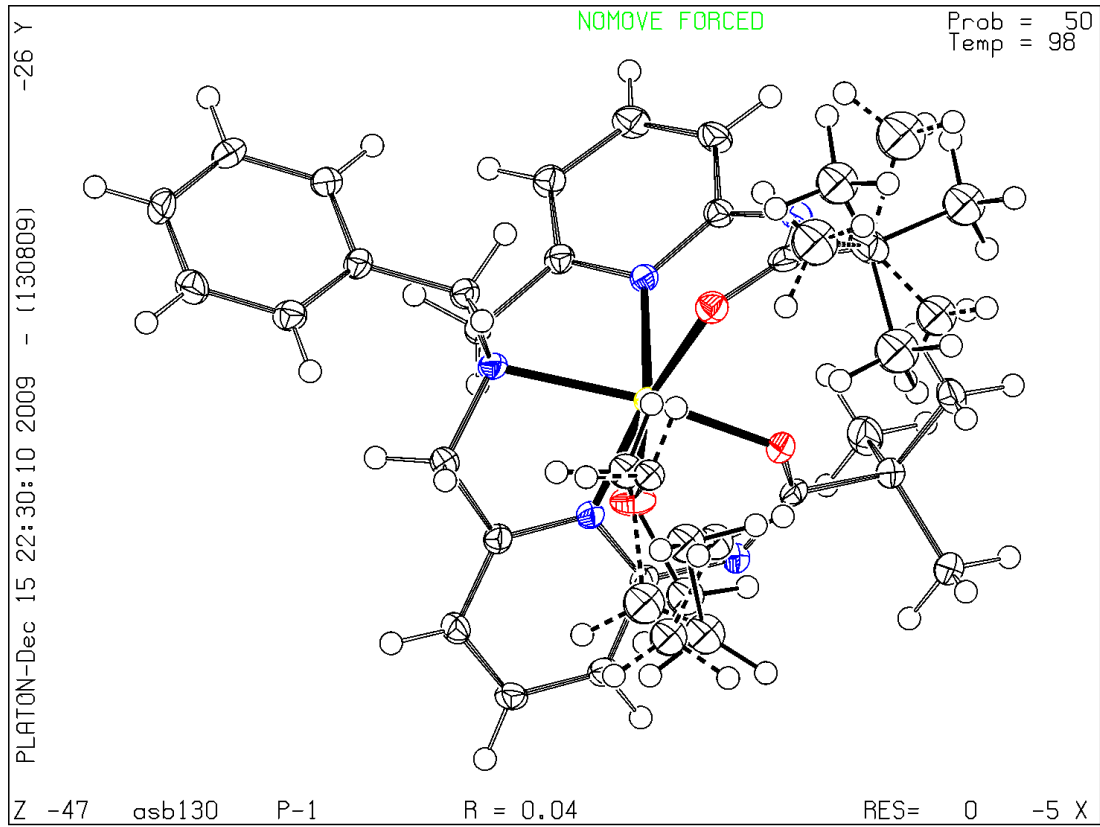

Supplement: NIHMS206240-supplement-01.pdf [file NIHMS206240-supplement-01.pdf]
